# Supplementary material for: Exploiting flow analysis as a tool for monitoring the leaching process of micronutrients using laboratory scale soil columns (LSSCs)
Source: Royal Society of Chemistry journal article supplement (doi:10.1039/d0ay00058b), 2020-01-01
Supplement: d0ay00058b1.pdf [file d0ay00058b1.pdf]

## Electronic supplementary information

### Exploiting flow analysis as a tool for monitoring the leaching process of micronutrients using laboratory scale soil columns (LSSCs)

Carolina F. F. A. Costa, Letícia S. Mesquita, Filipa V. Rocha, Raquel B. R. Mesquita\*,  
António O. S. S. Rangel

*Universidade Católica Portuguesa, CBQF - Centro de Biotecnologia e Química Fina –  
Laboratório Associado, Escola Superior de Biotecnologia, Rua Diogo Botelho 1327, 4169-  
005 Porto, Portugal*

[\\*rmesquita@porto.ucp.pt](mailto:rmesquita@porto.ucp.pt)

**ESI Table 1.** Average pH and conductivity (G) values registered for rainwater and leachates obtained from the different soil cores (U1, U2, F1, F2 and F2 burned) over an eight-day interval (t0 and t8). RSD, Relative standard deviation.

| Sample    | Time (days) | Average pH | RSD (%) | Average G ( $\mu\text{S cm}^{-1}$ ) | RSD (%) |
|-----------|-------------|------------|---------|-------------------------------------|---------|
| Rainwater |             | 6.40       | -       | 9.90                                | -       |
| U1*       | t0          | 7.48       | -       | 537                                 | -       |
|           | t8          | 7.93       | -       | 520                                 | -       |
| Rainwater |             | 6.58       | -       | 24.6                                | -       |
| F1        | t0          | 5.24       | 6       | 241                                 | 1       |
|           | t8          | 6.73       | 9       | 193                                 | 2       |
| Rainwater |             | 6.25       | -       | 40.4                                | -       |
| U2        | t0          | 6.38       | 1       | 109                                 | 10      |
|           | t8          | 7.15       | 1       | 65.3                                | 8       |
| Rainwater |             | 4.16       | -       | 31.0                                | -       |
| F2        | t0          | 4.07       | 1       | 176                                 | 5       |
| F2 burned | t0          | 5.64       | 4       | 1.57E+03                            | 0.2     |
| Rainwater |             | 4.93       | -       | 25.0                                | -       |
| F2        | t8          | 4.18       | 2       | 266                                 | 10      |
| F2 burned | t8          | 5.64       | 10      | 1.58E+03                            | 3       |

\*Since only one column was set-up with U1 soil, registered pH and G values refer only to that column, and not to an average value.

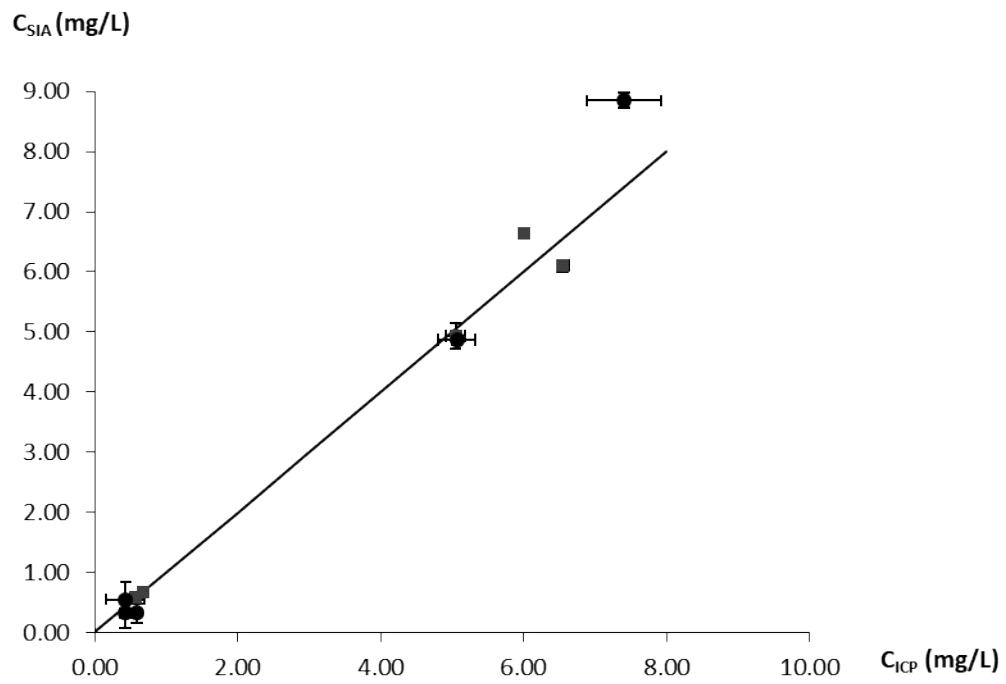

**ESI Fig. 1.** Accuracy assessment for the determination of calcium (■) and magnesium (●).

**ESI Table 2.** Average magnesium and calcium concentration values registered for rainwater and leachates obtained from the different soil cores (U1, U2, F1, F2 and F2 burned) over an eight-day interval (t0 and t8). RSD, Relative standard deviation of the column replicates.

| Sample    | Time (days) | Average Mg <sup>2+</sup><br>concentration (mg /L) | RSD<br>(%) | Average Ca <sup>2+</sup><br>concentration (mg /L) | RSD<br>(%) |
|-----------|-------------|---------------------------------------------------|------------|---------------------------------------------------|------------|
| Rainwater |             | 0.320                                             | -          | 2.27                                              | -          |
| U1        | t0          | 4.43                                              | -          | 20.1                                              | -          |
|           | t8          | 6.20                                              | -          | 14.5                                              | -          |
| Rainwater |             | 0.320                                             | -          | 2.27                                              | -          |
| F1        | t0          | 10.1                                              | 1          | 32.6                                              | 10         |
|           | t8          | 10.9                                              | 5          | 15.5                                              | 5          |
| Rainwater |             | 0.320                                             | -          | 2.27                                              | -          |
| U2        | t0          | 3.52                                              | 6          | 16.4                                              | 1          |
|           | t8          | 1.62                                              | 1          | 4.57                                              | 0.3        |
| Rainwater |             | 0.118                                             | -          | 0.592                                             | -          |
| F2        | t0          | 2.43                                              | 1          | 0.737                                             | 2          |
| F2 burned | t0          | 89.9                                              | 8          | 66.9                                              | 4          |
| Rainwater |             | 1.35                                              | -          | 0.676                                             | -          |
| F2        | t8          | 3.72                                              | 10         | 0.872                                             | 2          |
| F2 burned | t8          | 103                                               | 9          | 62.1                                              | 5          |
